# Supplementary material
Source: PubMed Central journal article supplement (PMC5797322)
Supplement: Supp_Table1.pdf [file Supp_Table1.pdf]

## Supplementary Data

SUPPLEMENTARY TABLE S1. MIXED ANALYSIS MATRIX FOR CHILD WITH LIFE-THREATENING ILLNESS AND HEALTHY SIBLINGS

| <i>Good parent attribute for child with LTI</i>                          | <i>Qualitative theme</i>               | <i>Illustrative quotation regarding child with LTI</i>                                                                                                                                                                                                                                                                                                                                                                                                         |
|--------------------------------------------------------------------------|----------------------------------------|----------------------------------------------------------------------------------------------------------------------------------------------------------------------------------------------------------------------------------------------------------------------------------------------------------------------------------------------------------------------------------------------------------------------------------------------------------------|
| Making sure that my child feels loved                                    | Balancing beliefs                      | Everything is important-her medicines, giving her the best care, but first you got to give her the love and everything else will just kind of fall in place. (Tamara)                                                                                                                                                                                                                                                                                          |
| Focusing on my child's health                                            | Balancing beliefs<br>parenting triage  | When they're ill we can't see them because of the infection control of Samantha. We can't take the chance. Literally for the last three weeks we haven't had much contact with our other three kids. We obviously talk to them or Skype, but we haven't been living in the house together. (David)                                                                                                                                                             |
| Making informed medical care decisions                                   | Balancing beliefs                      | Making good decisions on his behalf is most important, um... healthcare, for example, like signing up for Medicare insurance. (Daren)                                                                                                                                                                                                                                                                                                                          |
| Advocating for my child with medical staff                               | Parenting triage                       | We're pushing medical care to the nth degree. There's not much more that I think we can truly do. Pieces of it totally suck where we are, but we're doing everything. I have no regrets on what we've done throughout the process. (David)                                                                                                                                                                                                                     |
| Staying at my child's side                                               | Balancing beliefs<br>parenting triage  | I am going to spend time with her and be here no matter what. Me and my husband decided to hire a nanny (for the sibling) and in a day or two we thought well whoever is available, let's just try to find one and make sure that I'm here for some time and he's here for some time so we're not missing being with her. (Aditi)                                                                                                                              |
| Putting my child's needs above my own when making medical care decisions | Balancing beliefs<br>the toll it takes | No matter how impaired he may be, we really do love him and we always wanted him to be okay. So I hope he really feels that. I think about his pathway in the future, I don't want Daniel to resent us for making those decisions to continue his life, if he's in so much pain or ... it's too difficult. I always think about this. What would he say about the situation? (Vanessa)                                                                         |
| Focusing on my child's quality of life                                   | Balancing beliefs                      | Well, quality of life is a big thing versus quantity. That's the whole thing. I never lived by numbers. I choose not to live by numbers in that way. (Brenda)                                                                                                                                                                                                                                                                                                  |
| Focusing on my child's comfort                                           | Balancing beliefs<br>parenting triage  | A big factor is how she's doing ... it really has an effect on me, like I am feeling really happy today, "cause she's doing remarkably better today." (Kimberly)                                                                                                                                                                                                                                                                                               |
| Focusing on my child having as long a life as possible                   | Balancing beliefs<br>parenting triage  | It will be more chemo and they will get sicker, but what about if something happens in the next three days they find a cure or something? At the other hospital, they told me, there's no more chemo. His body can't handle anymore chemo. He gets really sick. And I said, no, there has to be something up there. I'm not going to give up. I told the doctor, can you search around, because we're willing to go anywhere and willing to do anything. (Isa) |
| Keeping a positive outlook                                               | The toll it takes                      | We just still sometimes look at each other and think, are we really going through this? Is this really happening? Is Rebecca really dying? And we just say, well for today she's not. (Valerie)                                                                                                                                                                                                                                                                |
| Keeping a realistic outlook                                              | Parenting triage                       | Caring for Avery (child with LTI) is just like having a job, but you never get off of work. You don't get a vacation. You just never get off of work, so you just fit it in with the rest of it. This is how it is now. (Yvonne)                                                                                                                                                                                                                               |
| Spiritual well-being                                                     | Balancing beliefs                      | Good parent is really about how God loves us, I want to love my kids unconditionally, all the time no matter what they do, I may not agree with their choices, but I am with them and that's what I feel like being a good parent is in this situation and really all of life. (Kimberly)                                                                                                                                                                      |

(continued)

SUPPLEMENTARY TABLE S1. (CONTINUED)

| <i>Good parent attribute for healthy sibling</i>                         | <i>Qualitative theme</i> | <i>Illustrative quote</i>                                                                                                                                                                                                                                                                                                                                                                                                                                                                                                                          |
|--------------------------------------------------------------------------|--------------------------|----------------------------------------------------------------------------------------------------------------------------------------------------------------------------------------------------------------------------------------------------------------------------------------------------------------------------------------------------------------------------------------------------------------------------------------------------------------------------------------------------------------------------------------------------|
| Making sure that my child feels loved                                    | Balancing beliefs        | Giving my kids love and support. You know, so many kids just don't know how it feels to be loved. Just loving my kids and nurturing my kids is first important to me. (Tamara)                                                                                                                                                                                                                                                                                                                                                                     |
| Focusing on my child's quality of life                                   | Balancing beliefs        | I'm telling my older daughter, "you're not any less important." Like we're not going to stop doing things for you; your life is not going to stop because we have this situation. You have to keep on doing your stuff. (Bianca)                                                                                                                                                                                                                                                                                                                   |
| Focusing on my child's health                                            | Parenting triage         | The elder child, she eats well, she's playing, she's being interactive, is she healthy or not that is why we keep checking. I'm really scared, with one like this (child with LTI) it makes you... you always have that in the back of the mind, like is she doing okay. (Aditi)                                                                                                                                                                                                                                                                   |
| Focusing on my child's comfort                                           | Parenting triage         | We're trying to make this as comfortable as possible for them, which is kind of difficult because we don't want them to get too disrupted. We don't want them to think that they're any less important, like their stuff is not gonna be put on hold. (Bianca)                                                                                                                                                                                                                                                                                     |
| Spiritual well-being                                                     | Parenting triage         | In the midst of this when mommy and daddy can't be here, God is always with you. They have a sense of peace. (Kimberly)                                                                                                                                                                                                                                                                                                                                                                                                                            |
| Keeping a positive outlook                                               | Parenting triage         | I want them to look up to me and know how to be strong, positive women. That's what I want out of them. That's all I ask for is them to do the right thing. (Brenda)                                                                                                                                                                                                                                                                                                                                                                               |
| Staying at my child's side                                               | Balancing beliefs        | It is important for consistency for Mia that she spends the majority of her time in our home. She wakes up in the same bed, goes to bed in the same bed usually with us around. It keeps the normal routine for waking up and then as much as we can for bedtime. (Francesca)                                                                                                                                                                                                                                                                      |
| Keeping a realistic outlook                                              | Balancing beliefs        | We didn't want to make a decision to say no, let her go and then them not be a part of that decision and then them be angry at us for not including them in any of that. The youngest particularly needs upfront honesty, so as brutal as it is, she needs to know it and hear it. She came right out and asked me the one day, are you taking us down there every day because this might be the last day that we see Alexis? And I said yes. (Wendy)                                                                                              |
| Focusing on my child having as long a life as possible                   | Balancing beliefs        | Unfortunately, I expect him to grow up and I see her life (child with LTI) as very short. She may not be here tomorrow. Whereas I expect him to be here, which is awful. I guess I parent them differently. Like I expect more from Ronan because I can see him growing up and I need to install manners and control. Whereas I don't know if I have to live for more than the moment with her. (Caroline)                                                                                                                                         |
| Putting my child's needs above my own when making medical care decisions | The toll it takes        | I think about Sofia's (sibling) quality of life-will she resent us for not being able to pay that much attention to her or not being able to go to those soccer games because he can't be around people. I think that it's definitely going to make me be a little more vigilant about how she's feeling about the situation, but she's at an age where she can't exactly verbalize, mommy, I'm upset, mommy, I'm sad. She can't talk to me, so I think it's being really in tune with what she's telling me, so I have to go into that. (Vanessa) |
| Making informed medical care decisions                                   | The toll it takes        | We put all of our resources into her care...but maybe Charles needed more academic excitement and we couldn't pull it off. (Olivia)                                                                                                                                                                                                                                                                                                                                                                                                                |
| Advocating for my child with medical staff                               | Parenting triage         | Staying night with everyone because we were not going to be split up and they all needed me. (Tamara)                                                                                                                                                                                                                                                                                                                                                                                                                                              |
